# Supplementary material for: Seeing Clearly: Effects of Initiatives to Improve Diabetic Retinopathy Screening at a Pediatric Center
Source: Oxford University Press journal article supplement (doi:10.2337/cd18-0084), 2019-02-16
Supplement: cd180084supplementarydata.docx [file cd180084supplementarydata.docx]

Supplementary Appendix for:
Seeing Clearly: Effects of Initiatives to Improve Diabetic Retinopathy Screening at a Pediatric Center

Carol K.L. Lam, Stephen Zborovski, Mark R. Palmert, and Jennifer Harrington

DOI: https://doi.org/10.2337/cd18-0084. Published 12 Feb 2019]

**Supplementary Data**

- Supplementary Figure
- Supplementary Table

**FIGURE 1. Rate of DRS.** Run chart showing rates of DRS screening in eligible patients with type 1 diabetes (T1DM) at baseline and during intervention.


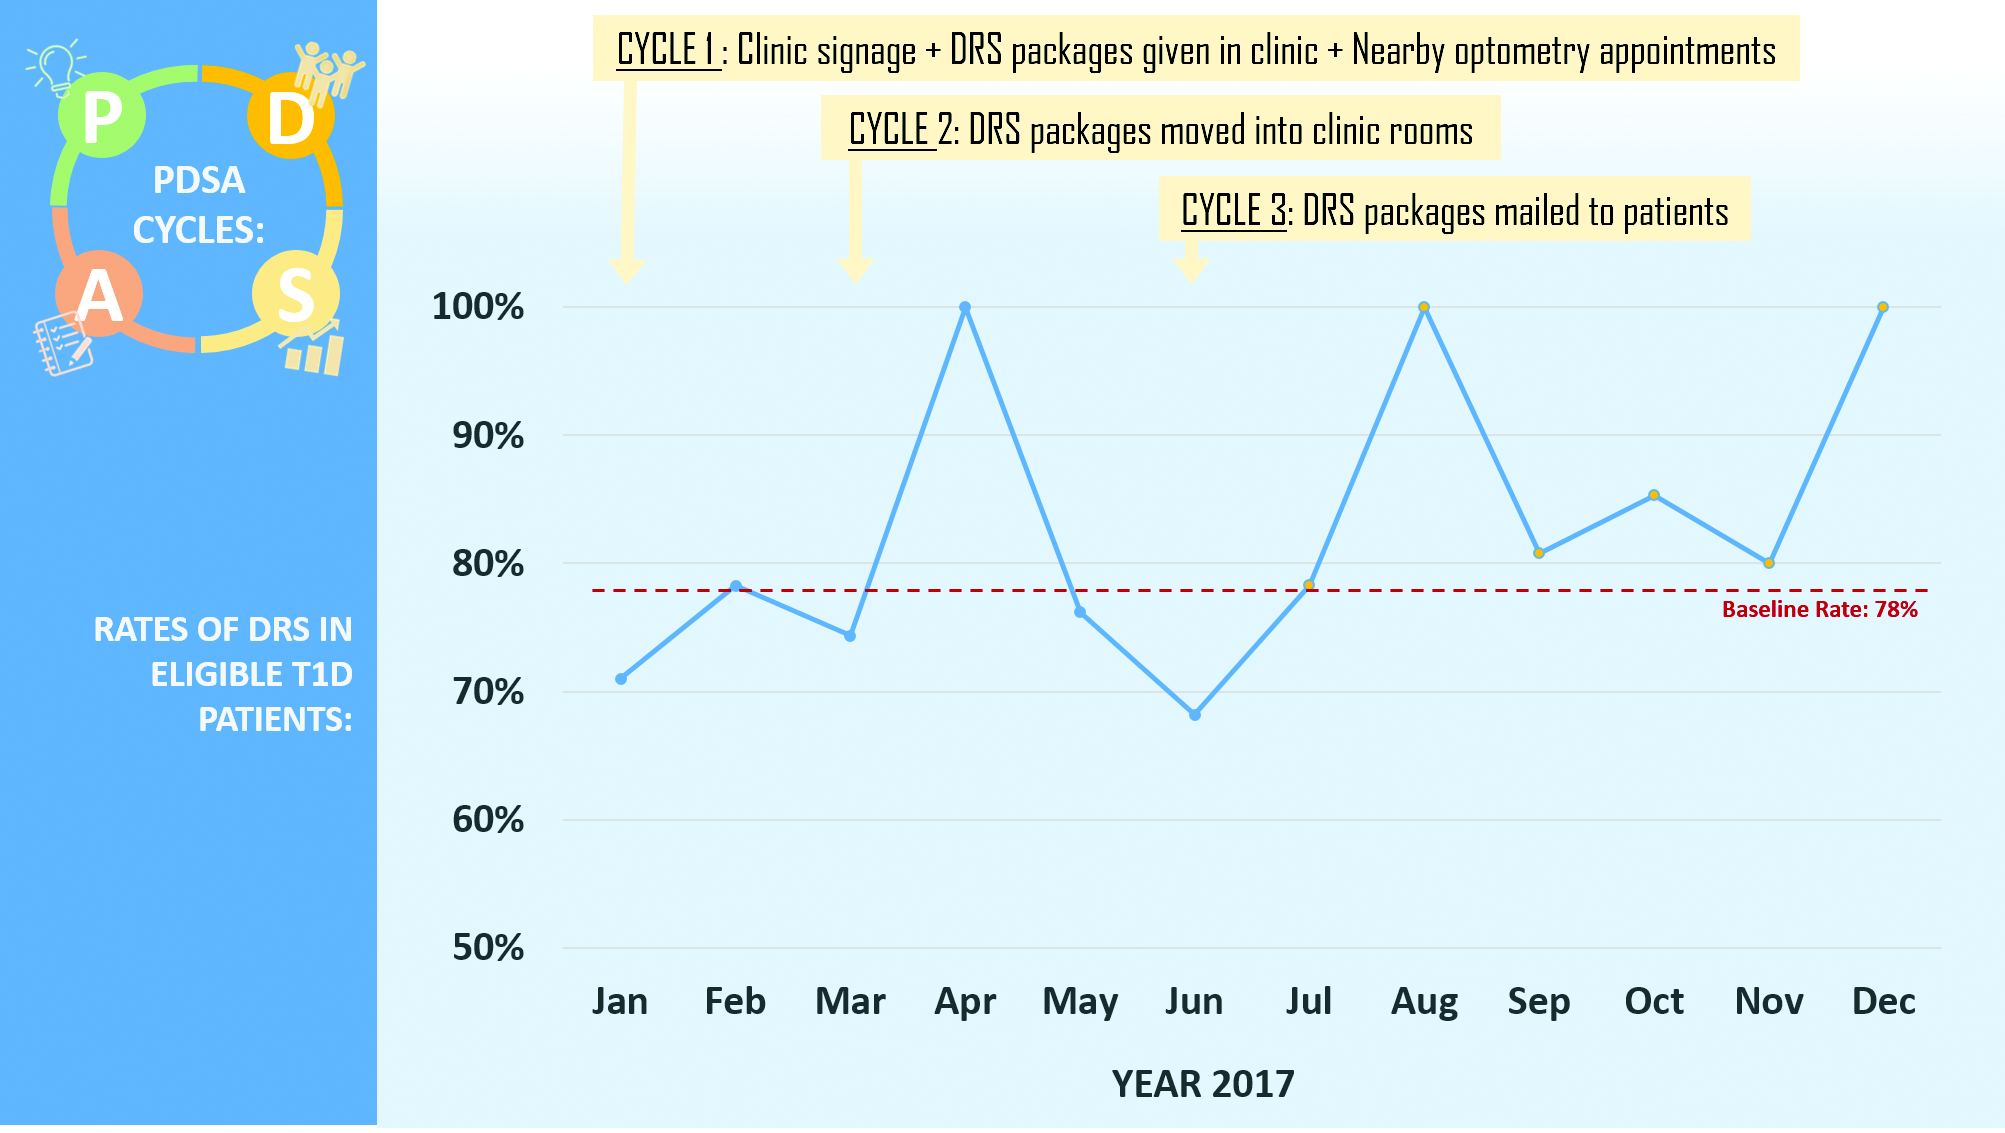


**TABLE 1.** Percentage of eligible patients with communication from eye care professional documented in the hospital’s EMR.

| **YEAR** | **PERCENT OF ELIGIBLE PATIENTS WITH COMMUNICATION FROM EYE CARE PROFESSIONAL IN HOSPITAL EMR** |
| --- | --- |
| 2015  (n = 120 eligible) | 6.3% |
| 2016  (n = 127) | 6.7% |
| 2017  (n = 126) | 16.7% (P <0.01) |
