# Supplementary material for: Seeing Clearly: Effects of Initiatives to Improve Diabetic Retinopathy Screening at a Pediatric Center
Source: Oxford University Press journal article supplement (doi:10.2337/cd18-0084), 2019-02-16
Supplement: cd180084supplementarydata.pdf [file cd180084supplementarydata.pdf]

# Supplementary Appendix for: Seeing Clearly: Effects of Initiatives to Improve Diabetic Retinopathy Screening at a Pediatric Center

Carol K.L. Lam, Stephen Zborovski, Mark R. Palmert, and Jennifer Harrington

DOI: <https://doi.org/10.2337/cd18-0084>. Published 12 Feb 2019]

## Supplementary Data

- Supplementary Figure
- Supplementary Table

**FIGURE 1. Rate of DRS.** Run chart showing rates of DRS screening in eligible patients with type 1 diabetes (T1DM) at baseline and during intervention.

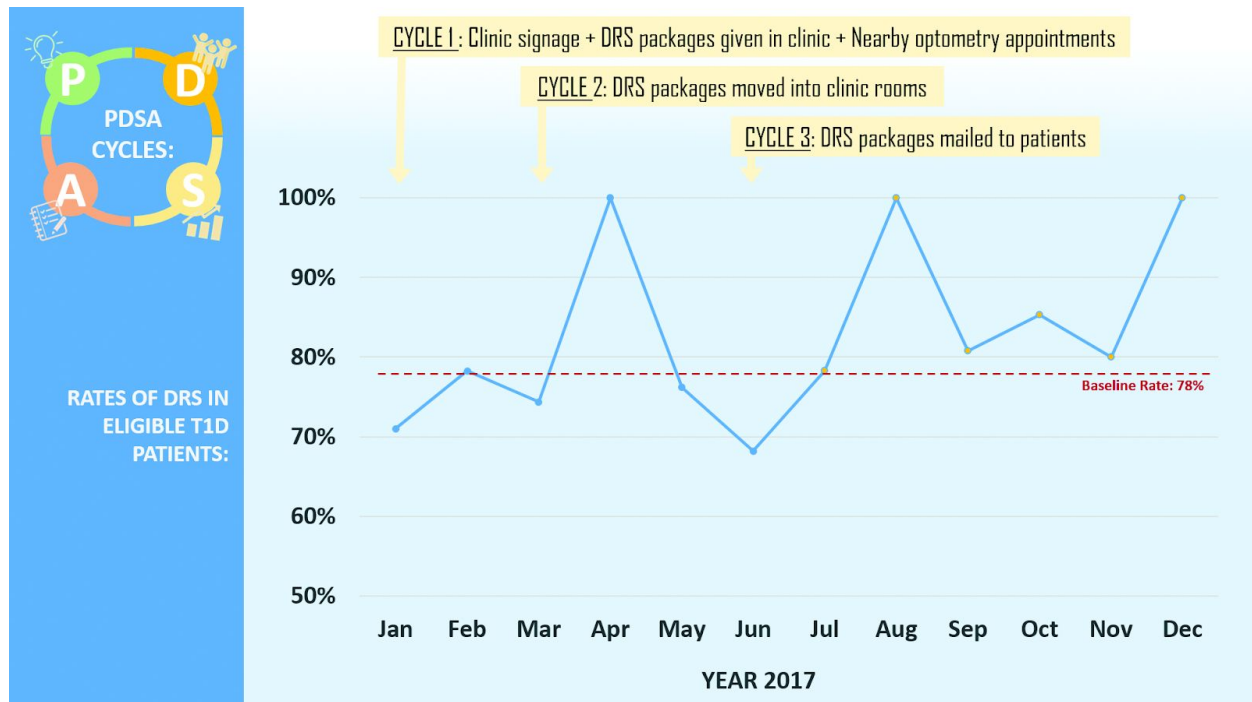

**TABLE 1.** Percentage of eligible patients with communication from eye care professional documented in the hospital's EMR.

| YEAR                       | PERCENT OF ELIGIBLE PATIENTS WITH COMMUNICATION FROM EYE CARE PROFESSIONAL IN HOSPITAL EMR |
|----------------------------|--------------------------------------------------------------------------------------------|
| 2015<br>(n = 120 eligible) | 6.3%                                                                                       |
| 2016<br>(n = 127)          | 6.7%                                                                                       |
| 2017<br>(n = 126)          | 16.7% (P <0.01)                                                                            |
